# Supplementary material for: Religiosity and Major Depression in Adults at High Risk: A Ten-Year Prospective Study
Source: Atypon-hosted journal article supplement (doi:10.1176/appi.ajp.2011.10121823), 2011-08-25

**FIGURE S1. Rates of Major Depression Between Time 10 and Time 20, By Risk Status and Personal Importance of Religion/Spirituality at Year 10**

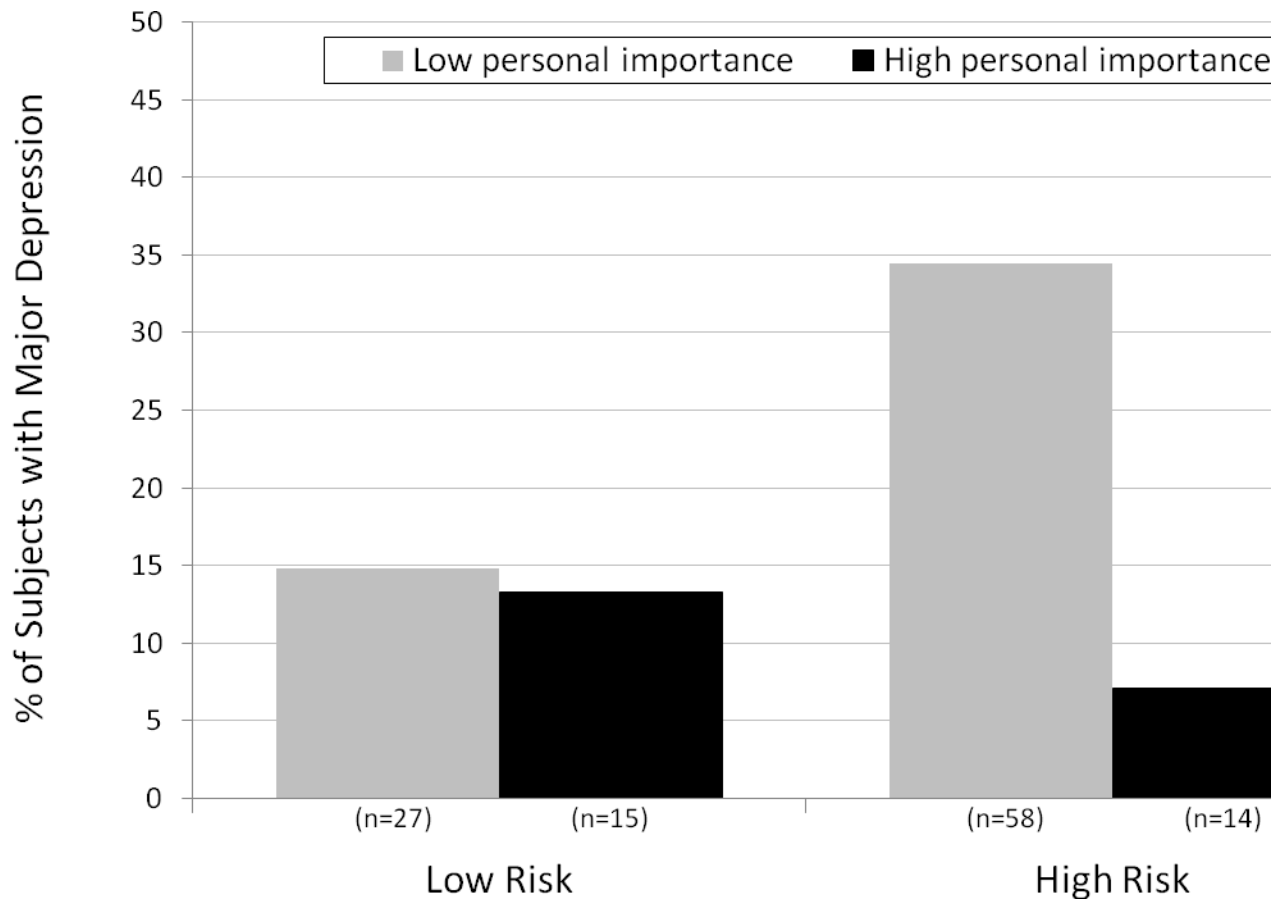

Supplement: appi.ajp.2011.10121823_ds001.pdf [file appi.ajp.2011.10121823_ds001.pdf]
